# Supplementary material
Source: PubMed Central journal article supplement (PMC4483768)
Supplement: supp_142.12.2203_DEV119891supp.pdf [file supp_142.12.2203_DEV119891supp.pdf]

## SUPPLEMENTARY METHODS

### RNA *in situ* hybridization

Deletion of *Fgfr2* from cre-expressing regions was validated by *in situ* hybridization using a digoxigenin-labeled antisense riboprobe synthesized from linearized plasmid containing exons 9–10 of *Fgfr2* (*Fgfr2<sup>iiiic-TM</sup>*, kindly provided by D. Ornitz). *Fgfr2* expression in wildtype tissue was analyzed using a riboprobe recognizing the cytoplasmic tyrosine kinase domain of FGFR2 from linearized *Fgfr2TK* plasmid (De Moerlooze et al., 2000). Whole mount *in situ* hybridization was performed according to published methods (Nieto et al., 1996) with the exceptions that Triton X-100 was replaced with Tween-20 in KTBT solution and the concentration of Triton X-100 in NTMT solution was raised from 0.1% to 1%.

### Experimental design

To minimize the effects of subtle stage variation among embryos within a single litter, each mutant embryo was compared to a stage-matched control littermate of the same sex. Except where noted, only data collected from male embryos was analyzed and reported. In experiments performed on tissue sections, at least 8 non-adjacent tissue sections were examined per embryo. Analysis of multiple cellular markers (e.g., cell adhesion, cytoskeletal, and cell cycle proteins) in individual genital tubercles was carried out using single antibodies on adjacent serial sections or using multiple antibodies for co-localization on single sections. Each figure in the manuscript is representative of the totality of data.

Table S1. Embryo collection and tissue fixation

| Experiment                               | Embryonic or neonatal tissue processed                    | Dissection medium | Fixative                          | Fixation temperature, duration |
|------------------------------------------|-----------------------------------------------------------|-------------------|-----------------------------------|--------------------------------|
| X-Gal staining of $\beta$ -galactosidase | Pelvis and posterior abdomen                              | PBS               | 0.2% PFA                          | 4°C, overnight                 |
| Immunohistochemistry/immunofluorescence  | Pelvis and posterior abdomen, hindlimbs removed           | PBS               | 0.2% PFA                          | 4°C, overnight                 |
| Histology                                | Pelvis and posterior abdomen, hindlimbs removed           | PBS               | 4% PFA                            | 4°C, overnight                 |
| Scanning electron microscopy             | Genital tubercle with ventral body wall and proximal tail | PBS               | 1% GA/4% PFA                      | 4°C, overnight                 |
| Transmission electron microscopy         | Genital tubercle with ventral body wall                   | PBS               | 1% GA/4% PFA in sodium cacodylate | 4°C, overnight                 |
| Whole mount <i>in situ</i> hybridization | Pelvis and posterior abdomen                              | DEPC PBS          | 4% PFA                            | 4°C, overnight                 |
| Quantitative real-time PCR               | Genital tubercle                                          | DEPC PBS          | RNAlater (Qiagen)                 | -20°C, indefinite              |

Table S2. Analyses performed on tissue sections

| Protocol                          | Preparation and infiltration                                                                     | Embedding medium                       | Stain                                                  |
|-----------------------------------|--------------------------------------------------------------------------------------------------|----------------------------------------|--------------------------------------------------------|
| Histology                         | Dehydrated to absolute ethanol, permeabilized with Xylene                                        | Paraffin (1:1 Paraplast Xtra and Plus) | Masson's trichrome (Richard Allan Scientific)          |
| Histology on X-Gal stained tissue | Dehydrated to absolute ethanol, permeabilized with Xylene                                        | Paraffin (1:1 Paraplast Xtra and Plus) | Nuclear fast red or Harris' Hematoxylin and 1% Eosin Y |
| Immunohistochemistry              | Dehydrated to absolute ethanol, permeabilized with Xylene                                        | Paraffin (1:1 Paraplast Xtra and Plus) | --                                                     |
| Immunofluorescence                | Equilibrated with 30% sucrose                                                                    | OCT (Tissue-Tek)                       | --                                                     |
| Transmission electron microscopy  | Dehydrated to pure acetone, resin infiltrated in graded acetone/Spurrs epoxy resin (Ellis, 2006) | Spurrs epoxy resin                     | 2% Uranyl acetate and Reynold's lead citrate           |

Table S3. Antibodies

| Primary antibody                          | Clone or catalog number | Manufacturer                         | Secondary antibody                              | Clone or catalog number | Manufacturer     |
|-------------------------------------------|-------------------------|--------------------------------------|-------------------------------------------------|-------------------------|------------------|
| Mouse IgG <sub>3</sub> anti-cytokeratin14 | NCL-LL002               | Novacastra                           | Goat anti-mouse IgG, HRP conjugate              | P 0447                  | Dako             |
| Rabbit IgG anti-Fgfr2 (Bek)               | C-17                    | Santa Cruz                           | AlexaFluor-647 goat anti-rabbit IgG             | A-21244                 | Molecular Probes |
| Mouse IgG <sub>1</sub> anti-βcatenin      | 14                      | BD Biosciences                       | AlexaFluor-546 goat anti-mouse IgG <sub>1</sub> | A-21123                 | Molecular Probes |
| Rabbit IgG anti-phospho-Histone H3        | 06-570                  | Millipore                            | AlexaFluor-488 goat anti-rabbit IgG             | A-11008                 | Molecular Probes |
| Mouse IgG <sub>1</sub> anti-BrdU          | G3G4                    | Developmental Studies Hybridoma Bank | AlexaFluor-546 goat anti-mouse IgG <sub>1</sub> | A-21123                 | Molecular Probes |

Table S4. Primer sequences

| Primer                         | Type       | Sequence                            |
|--------------------------------|------------|-------------------------------------|
| smcx1                          | Genotyping | 5' -CCG-CTG-CCA-AAT-TCT-TTG-G       |
| smc4                           | Genotyping | 5' -TGA-AGC-TTT-TGG-CTT-TGA-G       |
| Cre forward                    | Genotyping | 5' -TGA-CGG-TGG-GAG-AAT-GTT-AAT     |
| Cre reverse                    | Genotyping | 5' -GCC-GTA-AAT-CAA-TCG-ATG-AGT     |
| Fgfr2 <sup>fllox</sup> forward | Genotyping | 5' -ATA-GGA-GCA-ACA-GGC-GG          |
| Fgfr2 <sup>fllox</sup> reverse | Genotyping | 5' -TGC-AAG-AGG-CGA-CCA-GTC-AG      |
| Shh <sup>C</sup> forward       | Genotyping | 5' -ATG-CTG-GCT-CGC-CTG-GCT-GTG-GAA |
| Shh <sup>C</sup> reverse       | Genotyping | 5' -GAA-GAG-ATC-AAG-GCA-AGC-TCT-GGC |
| Rosa forward                   | Genotyping | 5' -AAA-GTC-GCT-CTG-AGT-TGT-TAT     |
| Rosa reverse                   | Genotyping | 5' -GGA-GCG-GGA-GAA-ATG-GAT-ATG     |
| LacZ reverse                   | Genotyping | 5' -GCG-AAG-AGT-TTG-TCC-TCA-ACC     |
| $\beta$ catenin forward        | qRT-PCR    | 5' -GTG-CAA-TTC-CTG-AGC-TGA-CA      |
| $\beta$ catenin reverse        | qRT-PCT    | 5' -CTT-AAA-GAT-GGC-CAG-CAA-GC      |
| Fgfr2 forward                  | qRT-PCR    | 5' -TCT-GGG-ACC-TCC-TTC-CAT-CTT-CTT |
| Fgfr2 reverse                  | qRT-PCR    | 5' -ACT-GTA-GCA-AAG-TGA-GTG-GGC-GTA |
| GAPDH forward                  | qRT-PCR    | 5' -CCA-AGG-TCA-TCC-ATG-ACA-ACT     |
| GAPDH reverse                  | qRT-PCR    | 5' -ATC-ACG-CCA-CAG-CTT-TCC         |
| Ptch1 forward                  | qRT-PCR    | 5' -TTG-TGG-AAG-CCA-CAG-AAA-ACC     |
| Ptch1 reverse                  | qRT-PCR    | 5' -TGT-CTG-GCG-TCC-GGA-TGG-A       |
| Shh forward                    | qRT-PCR    | 5' -ACG-GAC-CTT-CAA-GAG-CCT-TA      |
| Shh reverse                    | qRT-PCR    | 5' -CCC-ATG-GAG-CAG-GTT-TTA-GT      |

## SUPPLEMENTARY REFERENCES

- De Moerlooze, L., Spencer-Dene, B., Revest, J.-M., Hajihosseini, M., Rosewell, I. and Dickson, C.** (2000). An important role for the IIIb isoform of fibroblast growth factor receptor 2 (FGFR2) in mesenchymal-epithelial signalling during mouse organogenesis. *Development* **127**, 483-492.
- Nieto, M. A., Patel, K. and Wilkinson, D. G.** (1996). *In situ* hybridization analysis of chick embryos in whole mount and tissue sections. *Method Cell Biol.* **51**, 219-235.
- Petiot, A., Perriton, C. L., Dickson, C. and Cohn, M. J.** (2005). Development of the mammalian urethra is controlled by Fgfr2-IIIb. *Development* **132**, 2441-2450.

## SUPPLEMENTARY FIGURE LEGENDS

**Figure S1. Conditional inactivation of *Fgfr2* in the urethral and surface epithelia of the genital tubercle.** (A-D) *Fgfr2* expression in the developing external genitalia (Petiot et al., 2005) was validated by *in situ* hybridization on E13.5 whole genital tubercles (A,B) and transverse sections (C,D) using an antisense riboprobe complementary to the cytoplasmic tyrosine kinase (TK) domain of *Fgfr2* (*Fgfr2TK*; De Moerlooze et al., 2000). *Fgfr2* transcription was detected on the genital tubercle surface epithelium, including the preputial swellings (arrowheads), and in the developing urethra (arrow). (C,D) In tissue sections, *Fgfr2* expression was detected in the developing corpora cavernosa (cc), preputial glands (pg), urethra, and surface epithelium. In epithelia, *Fgfr2TK* transcript was most abundant in basal layers (triangle), although mRNA was also detected in suprabasal cells (D). (E-J'') Deletion of *Fgfr2* from target tissues was verified by whole mount *in situ* hybridization using an RNA probe specific to the floxed region of *Fgfr2*. Expression of both *Fgfr2* isoforms was visualized; the *Fgfr2<sup>fllox</sup>* loxP sites flank exons 7 (IIIa), 8 (IIIb), and 9 (IIIc) (Yu et al., 2003), and the *Fgfr2iic-TM* riboprobe hybridizes to exons 9 and 10

(transmembrane, TM). At E12.5 *Fgfr2* expression is evident in the distal urethra (arrows) of control and *Fgfr2<sup>EctoΔ</sup>* mutant genital tubercles but is absent from *Fgfr2<sup>EndoΔ</sup>* mutants. By E14.5, *Fgfr2* transcripts are detectable in the urethral and surface ectodermal (arrowheads) epithelia of controls, but are absent from the urethrae of *Fgfr2<sup>EndoΔ</sup>* mutants and from the surface ectoderm of *Fgfr2<sup>EctoΔ</sup>* mutants. Restriction of *Fgfr2* expression to Cre-negative regions of the genital tubercles confirms that *Fgfr2* is deleted specifically in the cells targeted by the Cre alleles. (K-M) Immunofluorescence of FGFR2 reveals no changes in the localization of ectodermal FGFR2 in *Fgfr2<sup>EndoΔ</sup>* mutants, of urethral FGFR2 in *Fgfr2<sup>EctoΔ</sup>* mutants, or of mesenchymal FGFR2 (yellow arrows) in either mutant. Scale bars: 100 μm.

**Figure S2. Variation in hypospadias and preputial anomalies resulting from ectodermal *Fgfr2* deletion.** Oversized and ectopic urethral openings in *Fgfr2<sup>EctoΔ</sup>* mutants at P0 can be seen in β-galactosidase-stained male (A-D) and female (E), and in unstained female (F) genital tubercles. Urethral tube defects range in severity from glanular (A), to coronal (B), to midshaft (C), to proximal (D) hypospadias in males. Female mutants also develop hypospadias (E,F). Arrows denote urethral meatuses; arrowheads mark preputial ectoderm. Scale bars: 100 μm.

**Figure S3. Urethral cells lacking *Fgfr2* do not undergo epithelial-mesenchymal transition.** Immunohistochemical analysis of K14 in transverse sections of β-galactosidase-stained *Fgfr2<sup>EndoΔ</sup>* and control genital tubercles at E14.5 shows that endodermal cells (blue) remain

within the urethral epithelium and are not detected in the adjacent mesenchyme. Scale bars: 50  $\mu\text{m}$ .

**Figure S4. Development of the genital tubercle in the absence of ectodermal *Fgfr2*.** Light micrographs of *Fgfr2*<sup>Ecto $\Delta$</sup>  mutant and control genital tubercles from stages E13 to E16 show that *Fgfr2*<sup>Ecto $\Delta$</sup>  mutants develop an ectopic proximal urethral opening (insets in A-D) that expands into an abnormally large hypospadiac opening (arrows in E,F). The preputial swellings are displaced dorsally at early stages (white triangles in A-D) and fail to meet at the ventral midline at later stages (black triangles in E,F). Scale bars: 100  $\mu\text{m}$ .

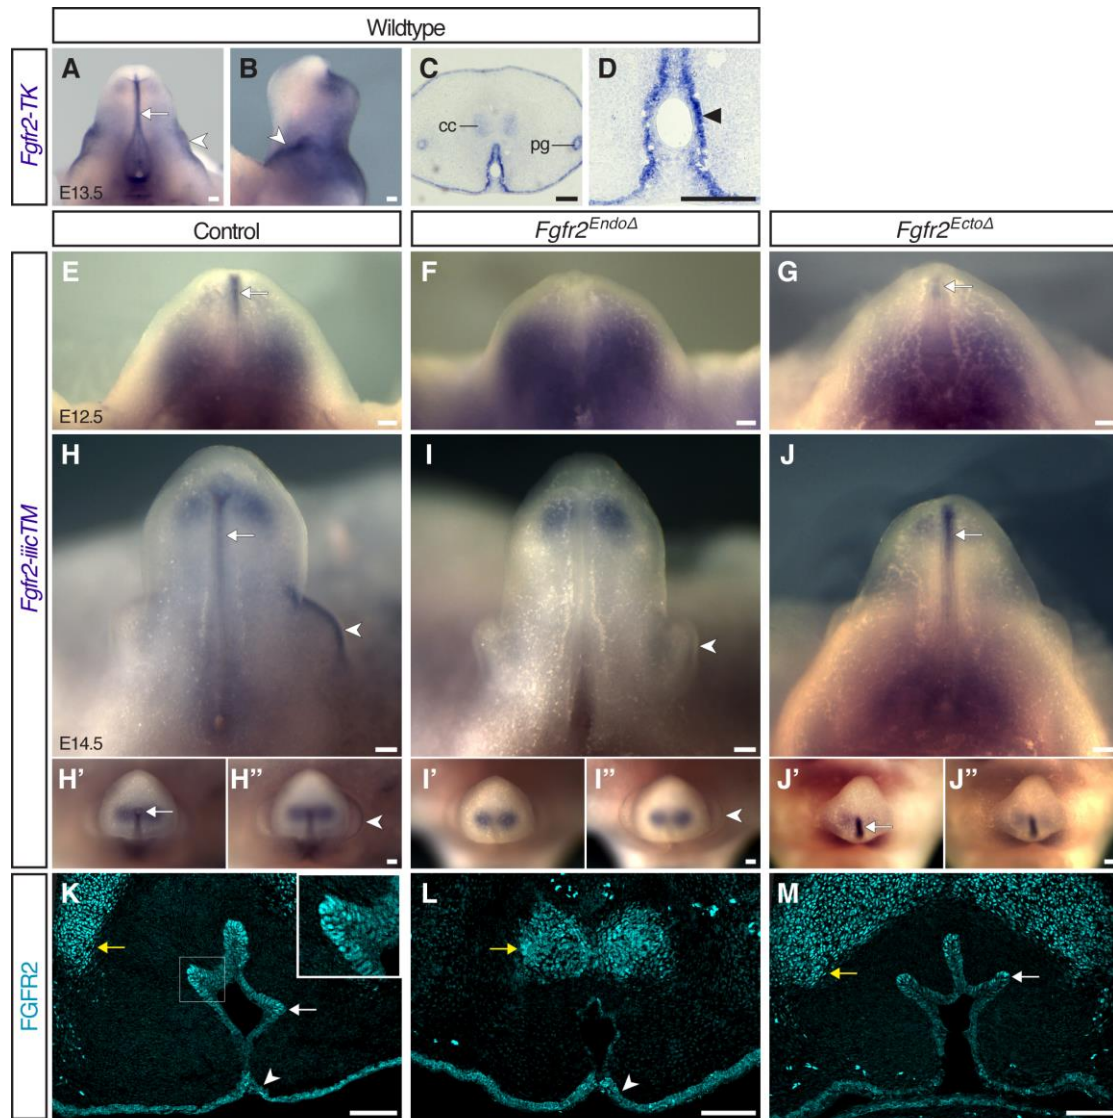



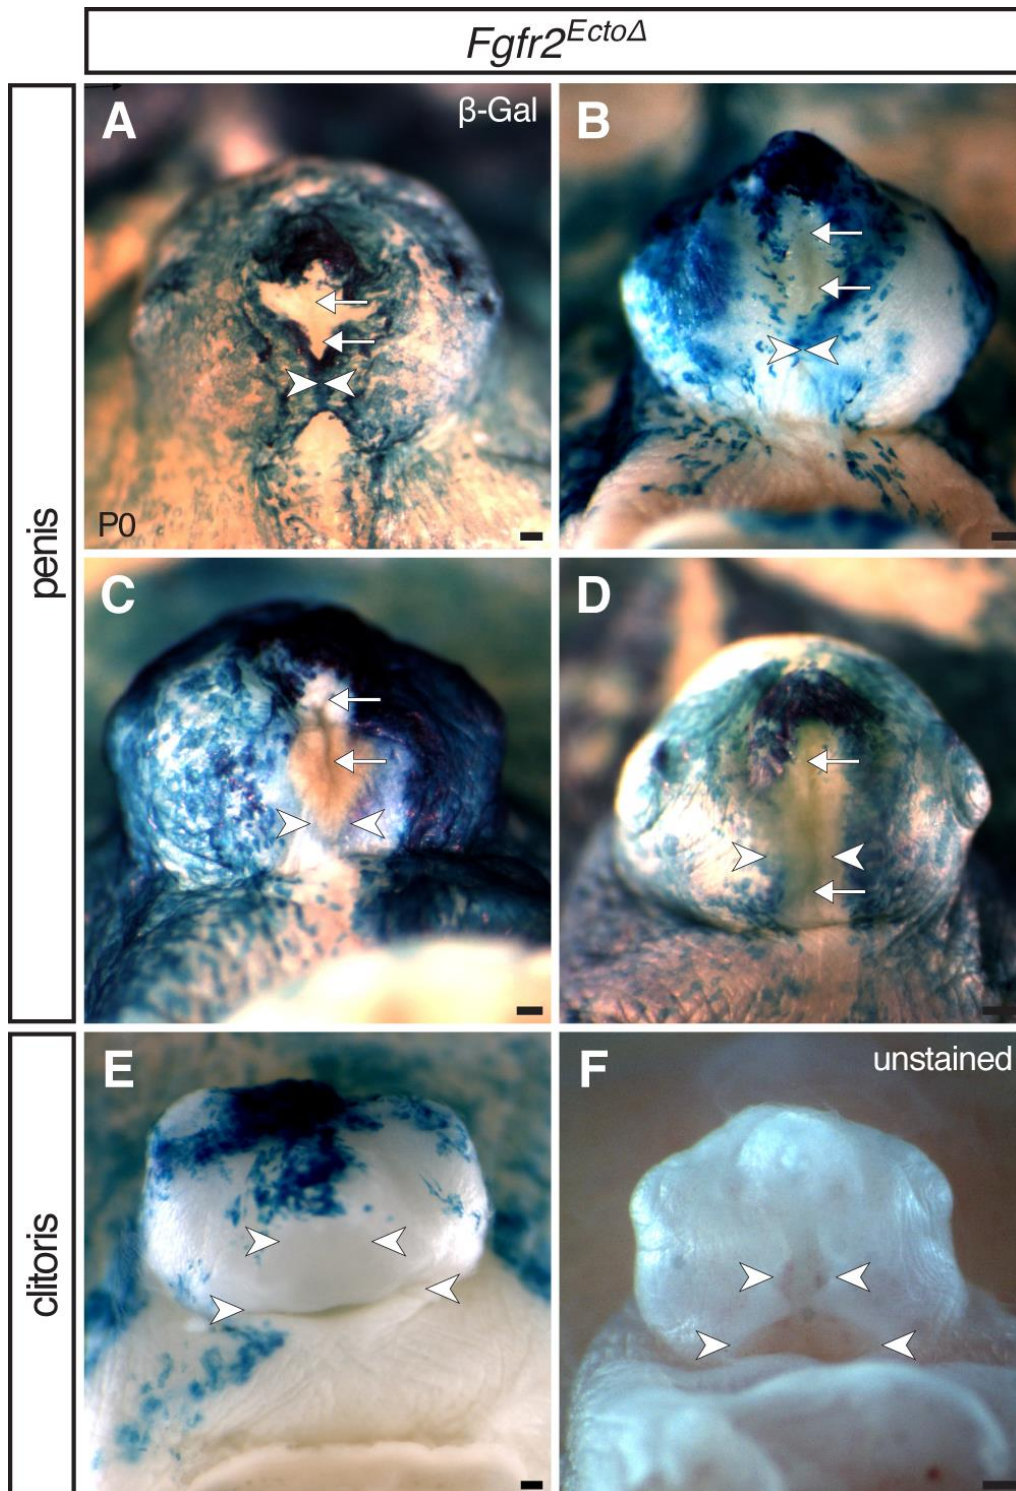

Figure S2. Variation in hypospadias and preputial anomalies resulting from ectodermal *Fgfr2* deletion.

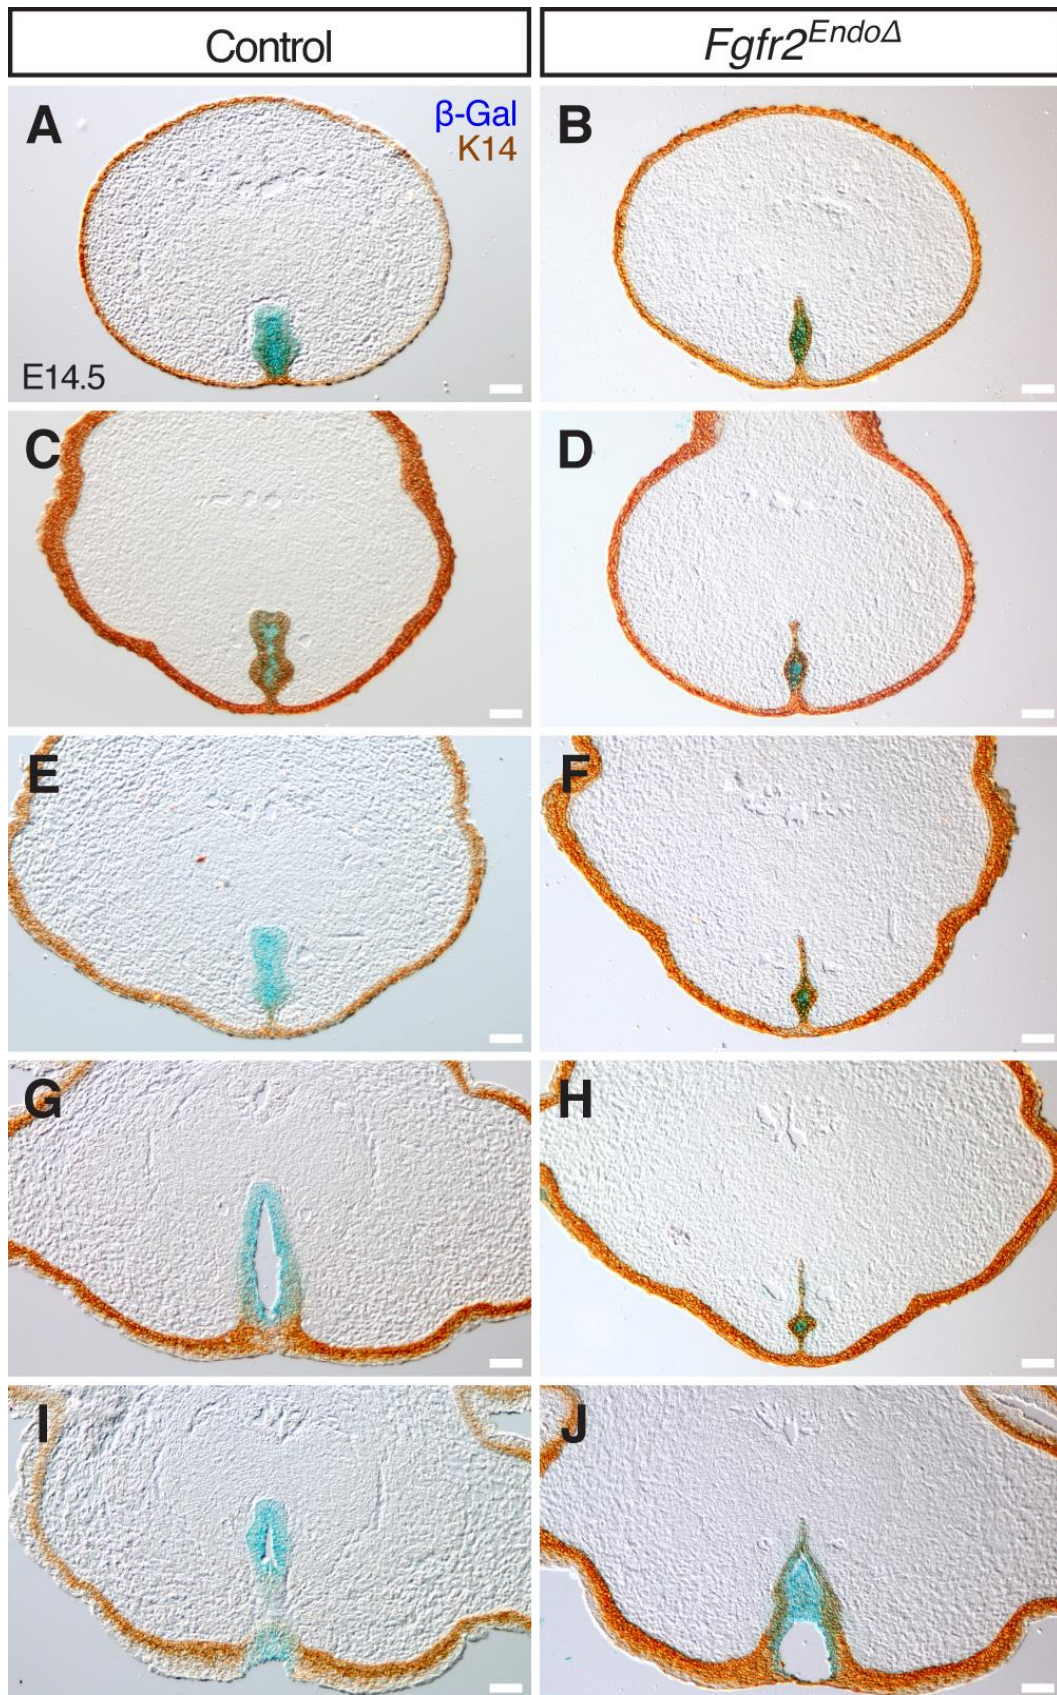

Figure S3. Urethral cells lacking *Fgfr2* do not undergo epithelial-mesenchymal transition.

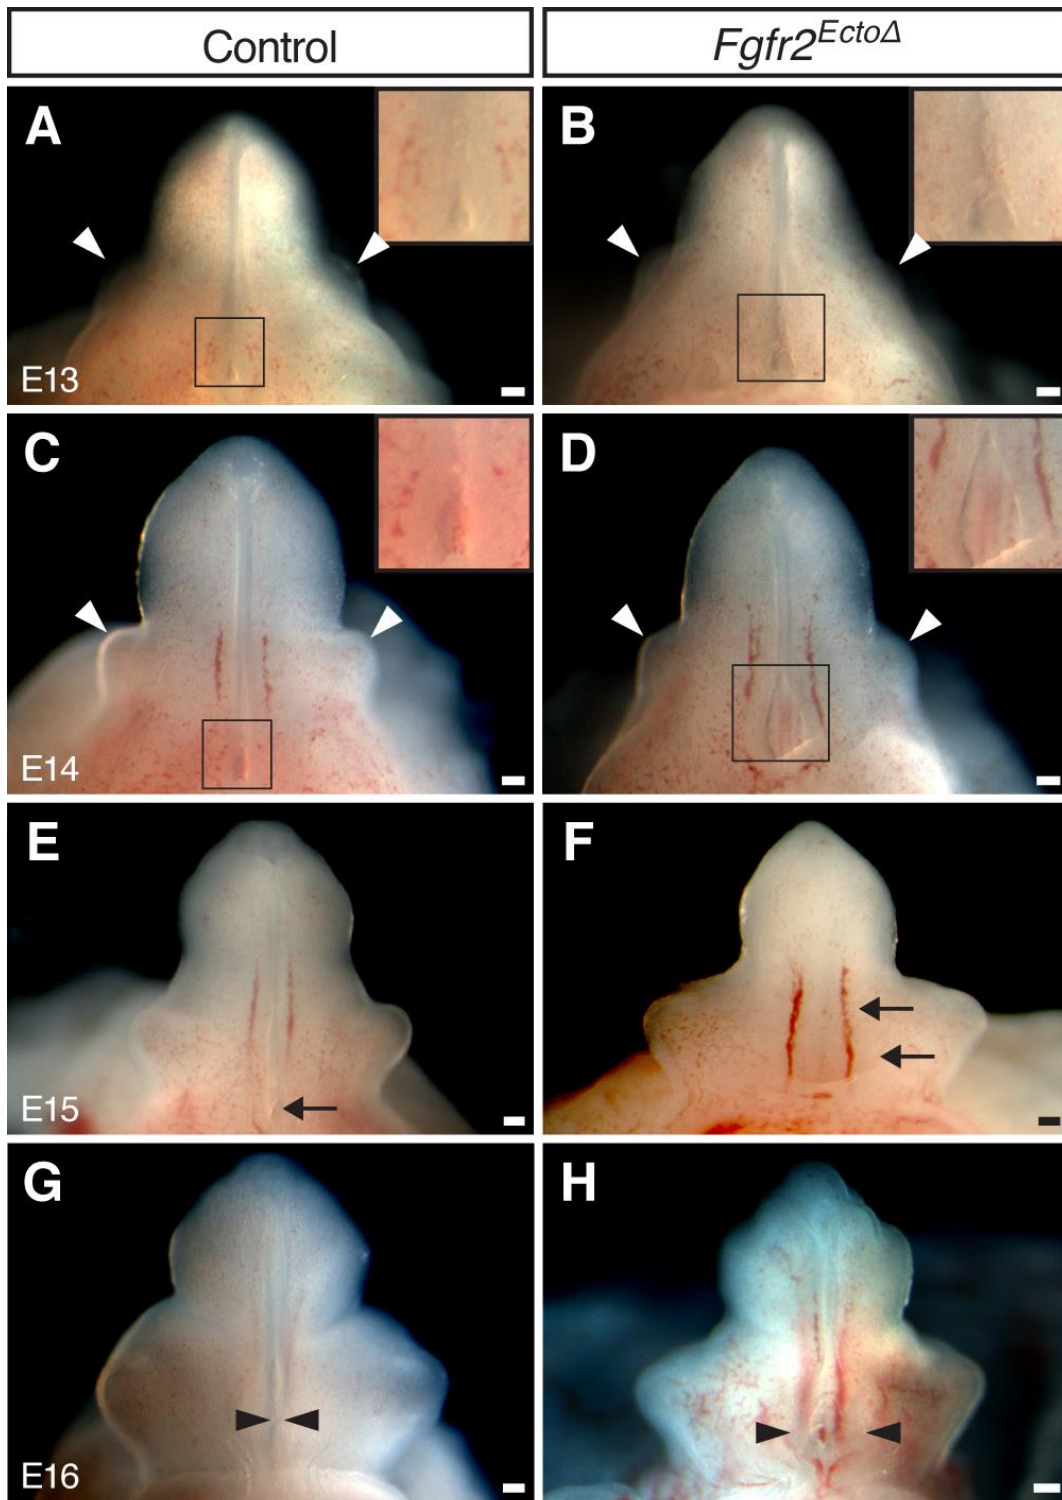

Figure S4. Development of the genital tubercle in the absence of ectodermal *Fgfr2*.
